# Supplementary material for: Make waste profitable: repurposing SAPO-34 coke from the methanol-to-olefin reaction for luminescent CDs@zeolite composites
Source: Royal Society of Chemistry journal article supplement (doi:10.1039/d2qi00998f), 2022-01-01
Supplement: d2qi00998f3.pdf [file d2qi00998f3.pdf]

## Supporting information

### **Make waste profitable: repurposing SAPO-34 coke from methanol - to-olefins reaction for luminescent CDs@zeolite composites**

Wenyan Ma, Yida Zhou, Jiani Zhang, Siyu Zong, Bolun Wang\*, Jiyang Li\*

*State Key Laboratory of Inorganic Synthesis and Preparative Chemistry, College of Chemistry, Jilin University, Changchun 130012, China.*

Corresponding authors:

E-mail addresses: wangbolun@jlu.edu.cn (Bolun Wang), lijijiang@jlu.edu.cn (Jiyang Li)

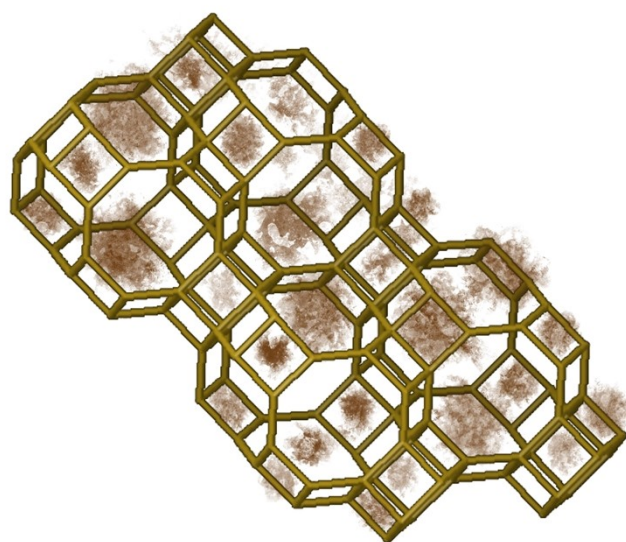

**Fig. S1.** Schematic diagram of SAPO-34 zeolite and the confined coke (brown filler).

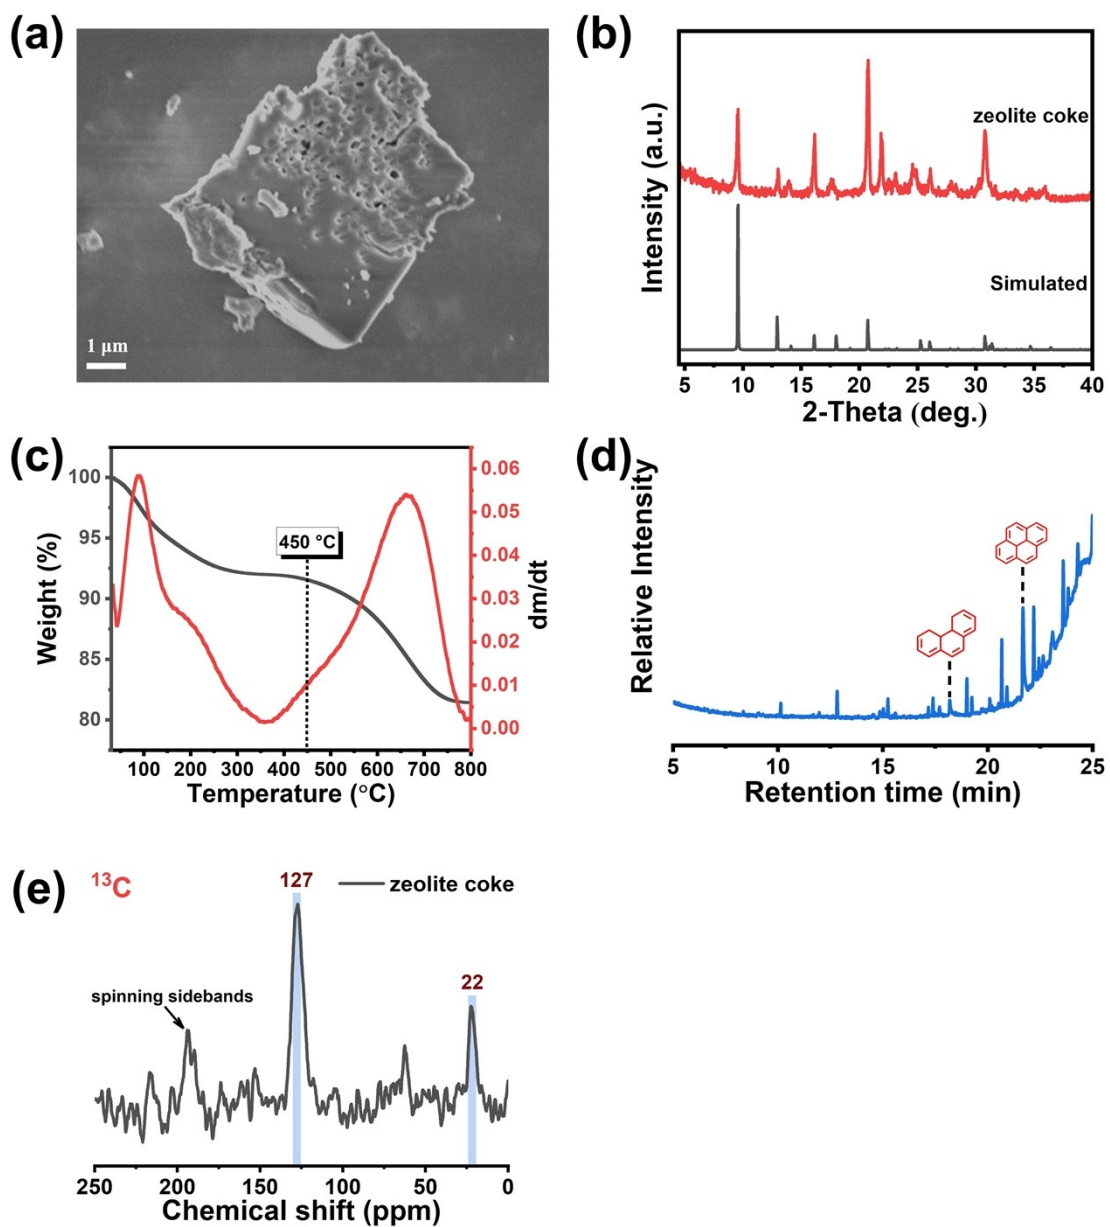

**Fig. S2.** (a) SEM image of deactivated SAPO-34 zeolite. (b) PXRD patterns of simulated CHA zeolite and deactivated SAPO-34 zeolite. (c) Thermalgravimetric (TG) curve and differential thermalgravimetric (DTG) curve of deactivated SAPO-34 zeolite. (d) GC-MS chromatogram of occluded organic species in SAPO-34 coke. (e)  $^{13}\text{C}$  MAS NMR spectrum of zeolite coke.

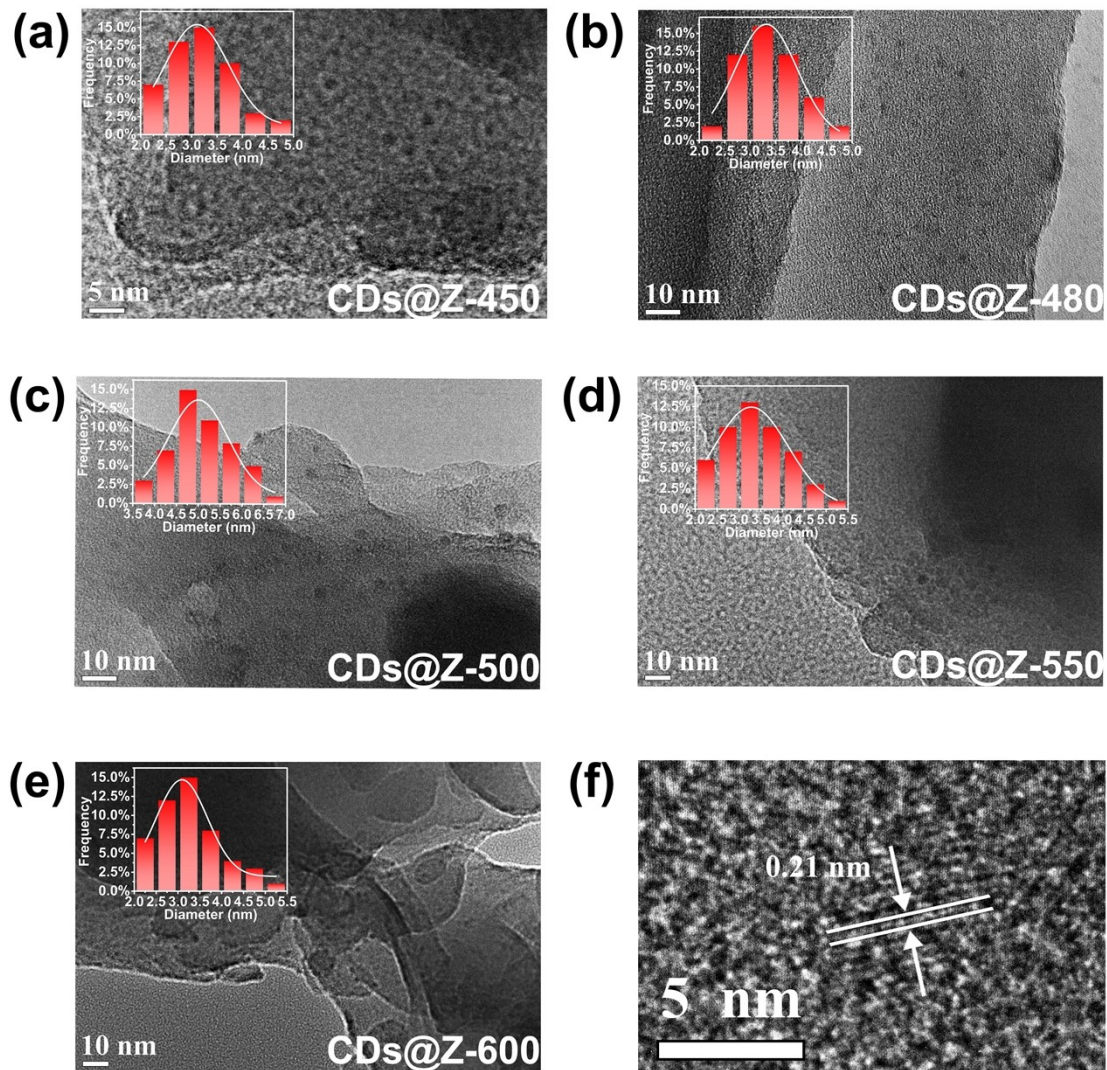

**Fig. S3.** (a-e) TEM images (inset: the particle diameter distribution of CDs) of CDs@Z-T (T=450, 480, 500, 550, 600) composites, respectively. (f) HRTEM image of CDs retained in CDs@Z-520 composite.

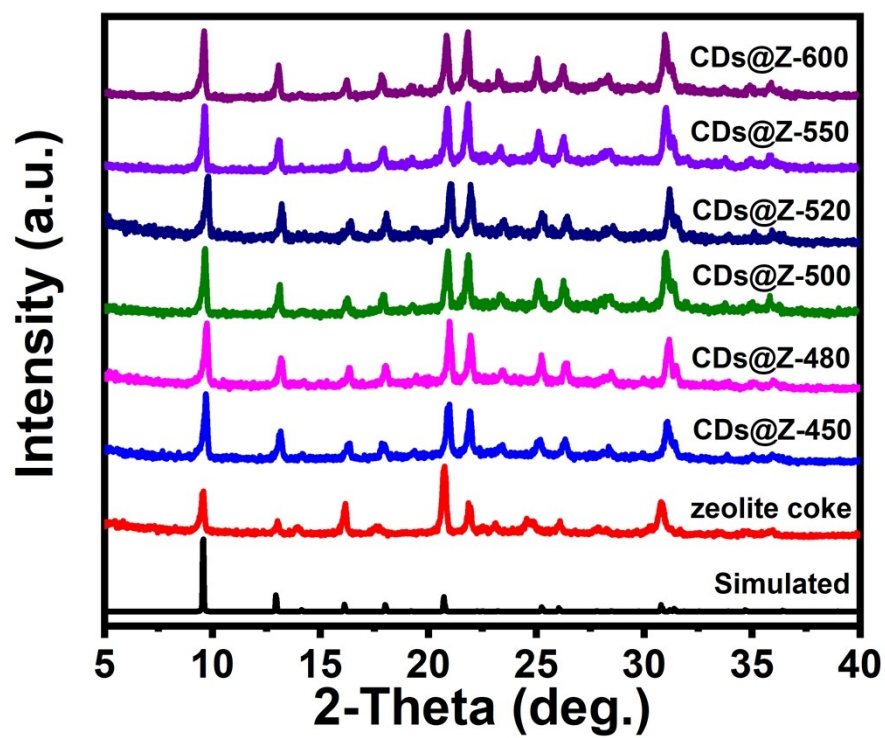

Fig. S4. PXRD patterns of CDs@Z-T composites.



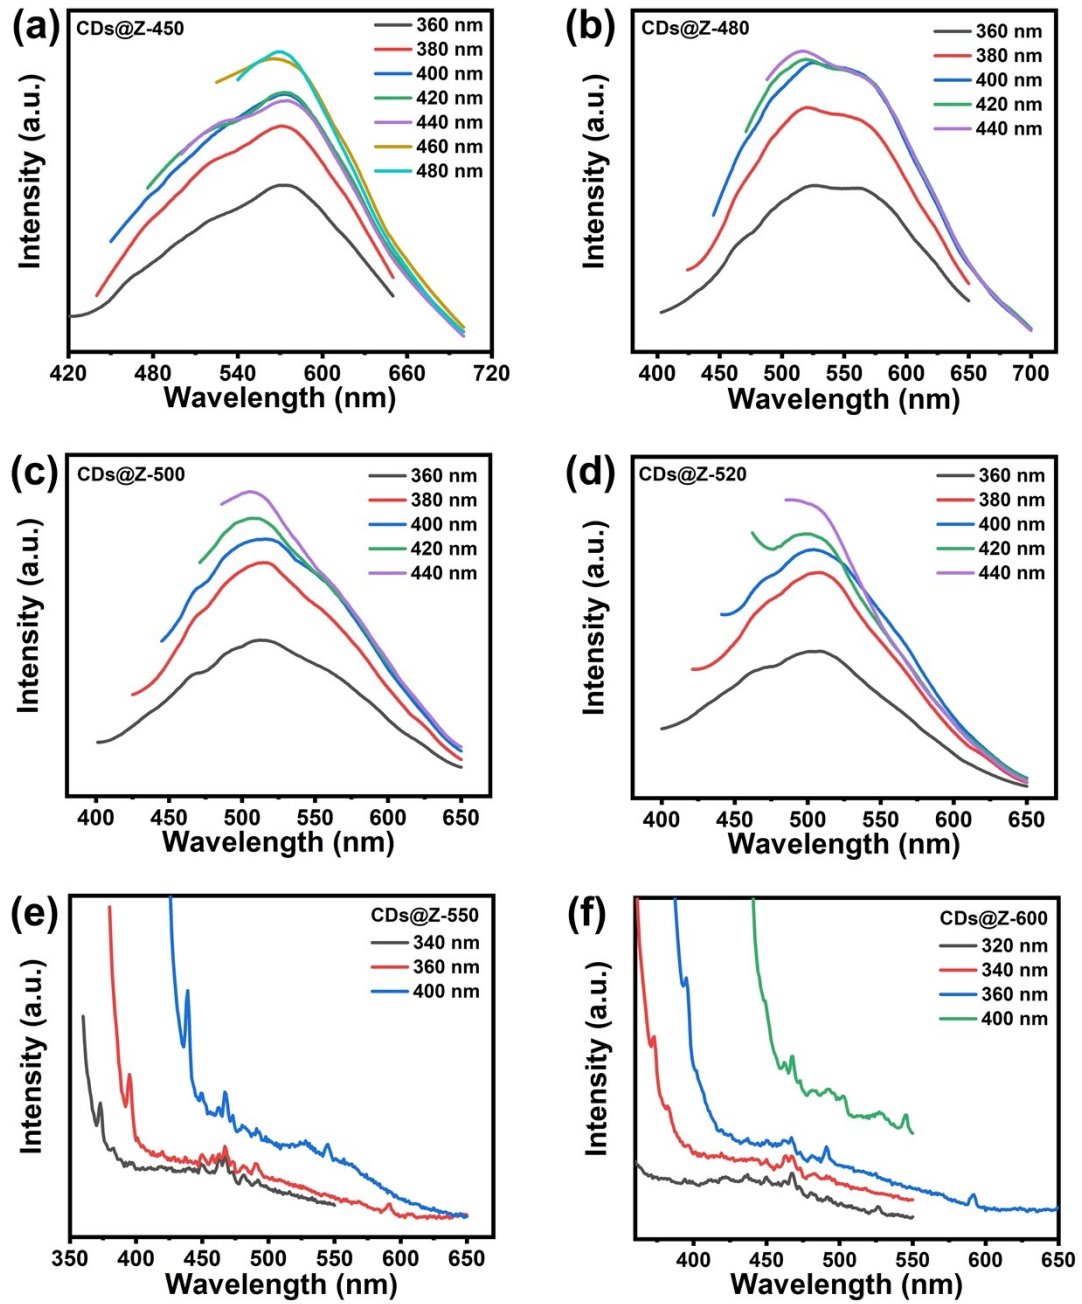

**Fig. S5.** The fluorescence emission spectra of CDs@Z-T composite under different excitation wavelengths.

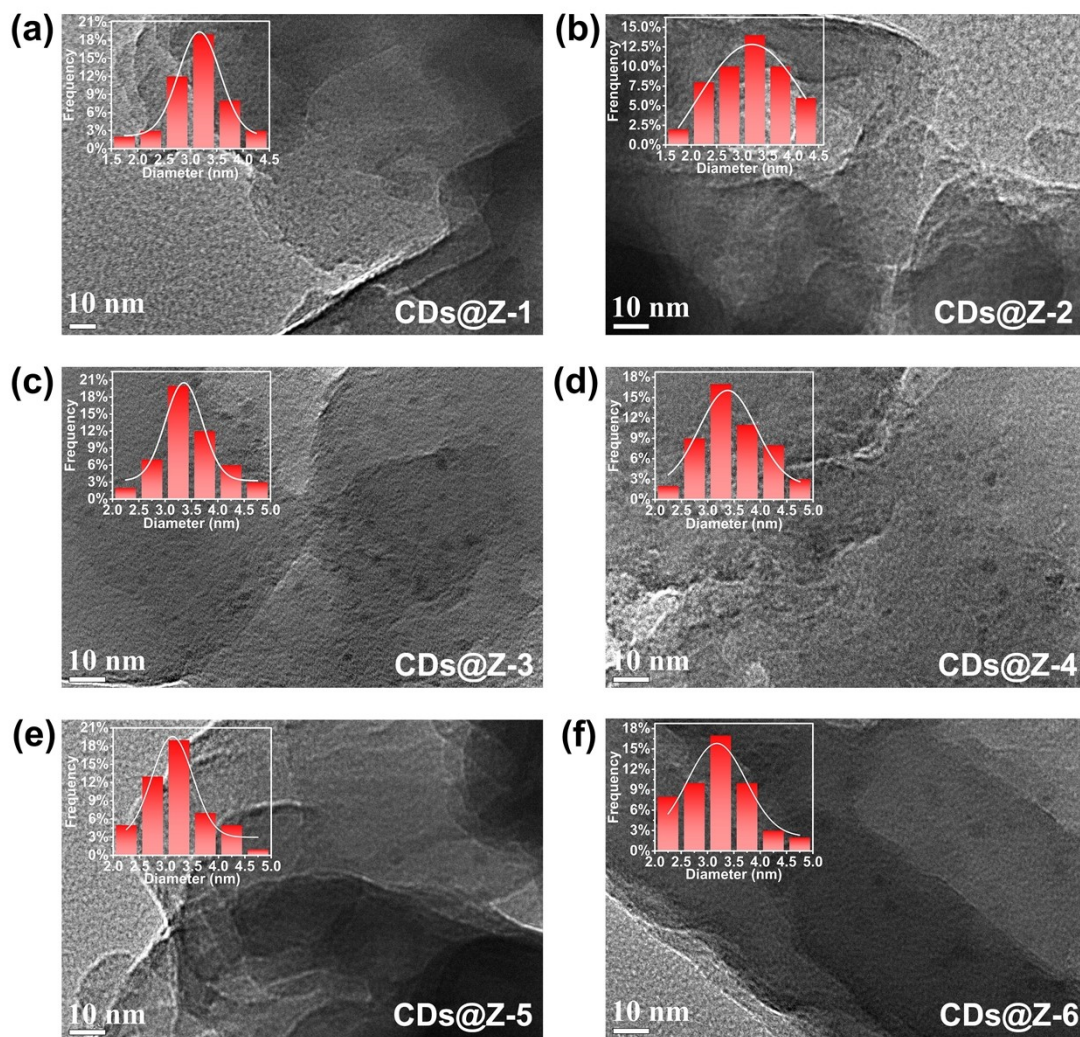

**Fig. S6.** TEM images of the CDs embedded in CDs@Z-t composites (inset: the particle diameter distribution of the CDs particle).

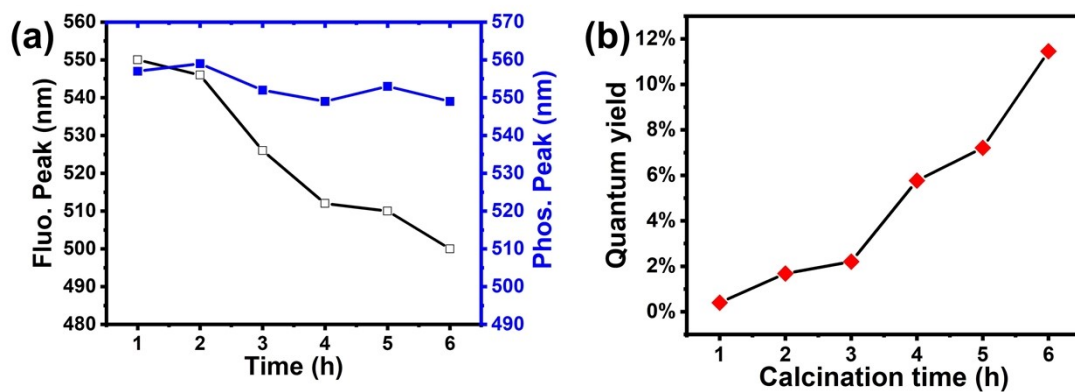

**Fig. S7.** (a) Fluorescence and phosphorescence emission peaks positions of CDs@Z-t, (b) Luminescent quantum yields of CDs@Z-t at different calcination time for 520 °C.



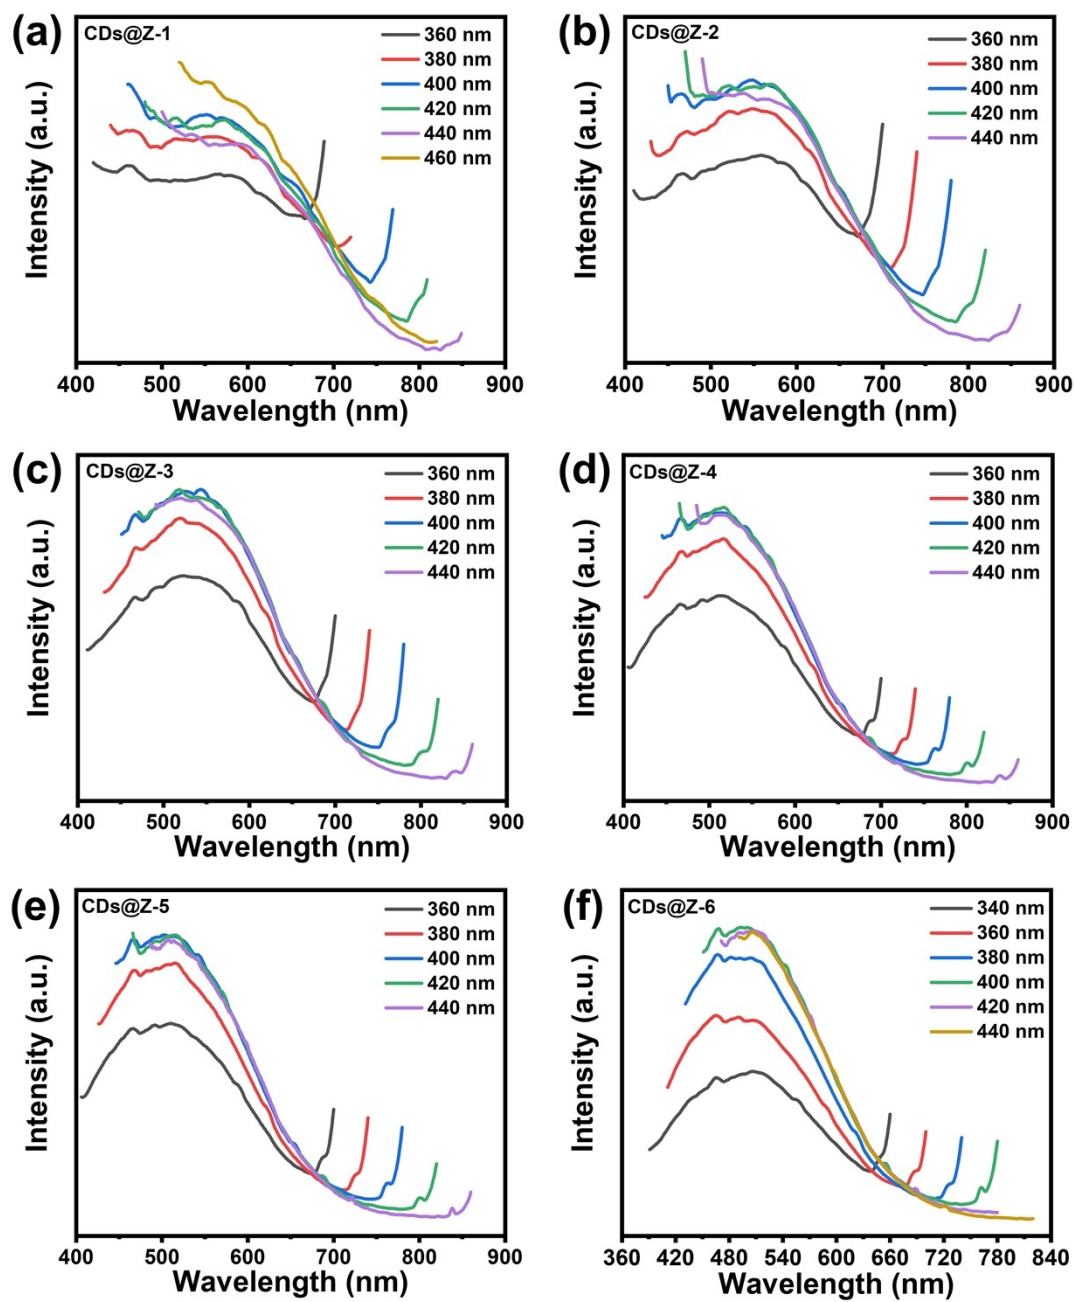

**Fig. S8.** The fluorescence emission spectra of CDs@Z-t composite under different excitation wavelengths ( $t=1, 2, 3, 4, 5, 6$ ).

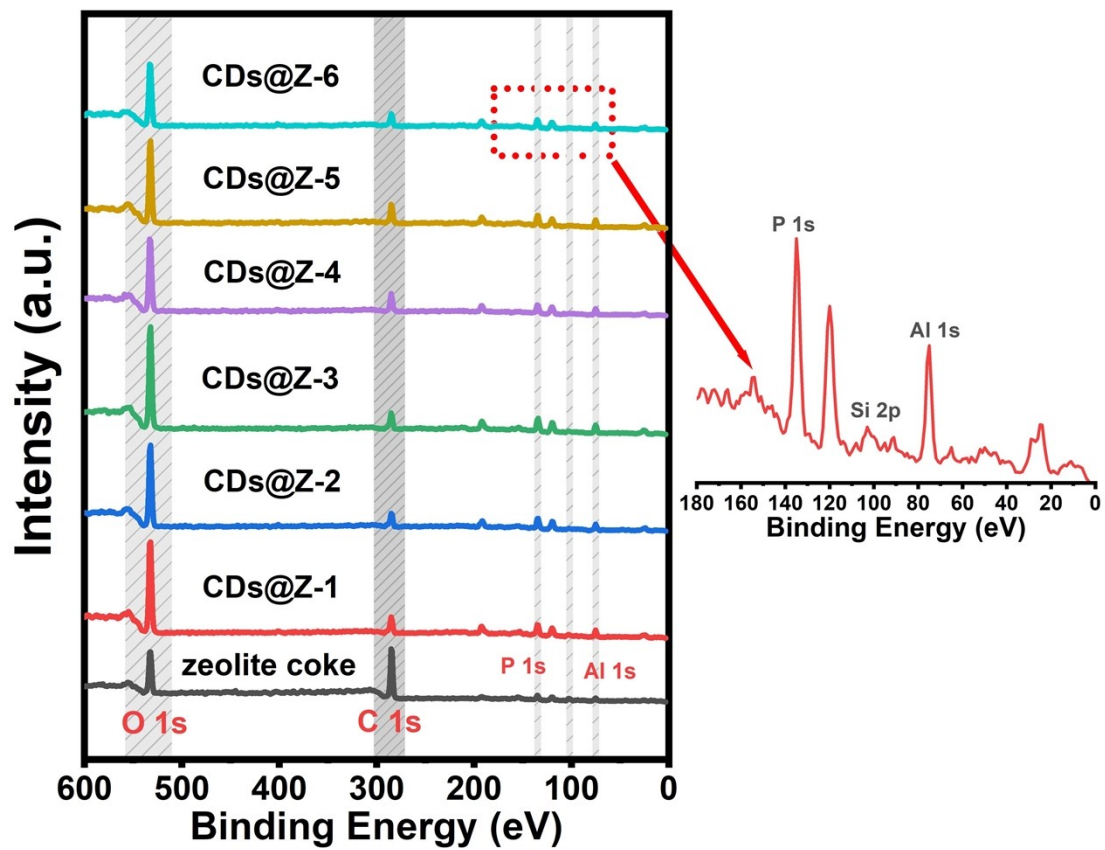

Fig. S9. XPS spectra of the zeolite coke and CDs@Z-t (t=1、2、3、4、5、6).

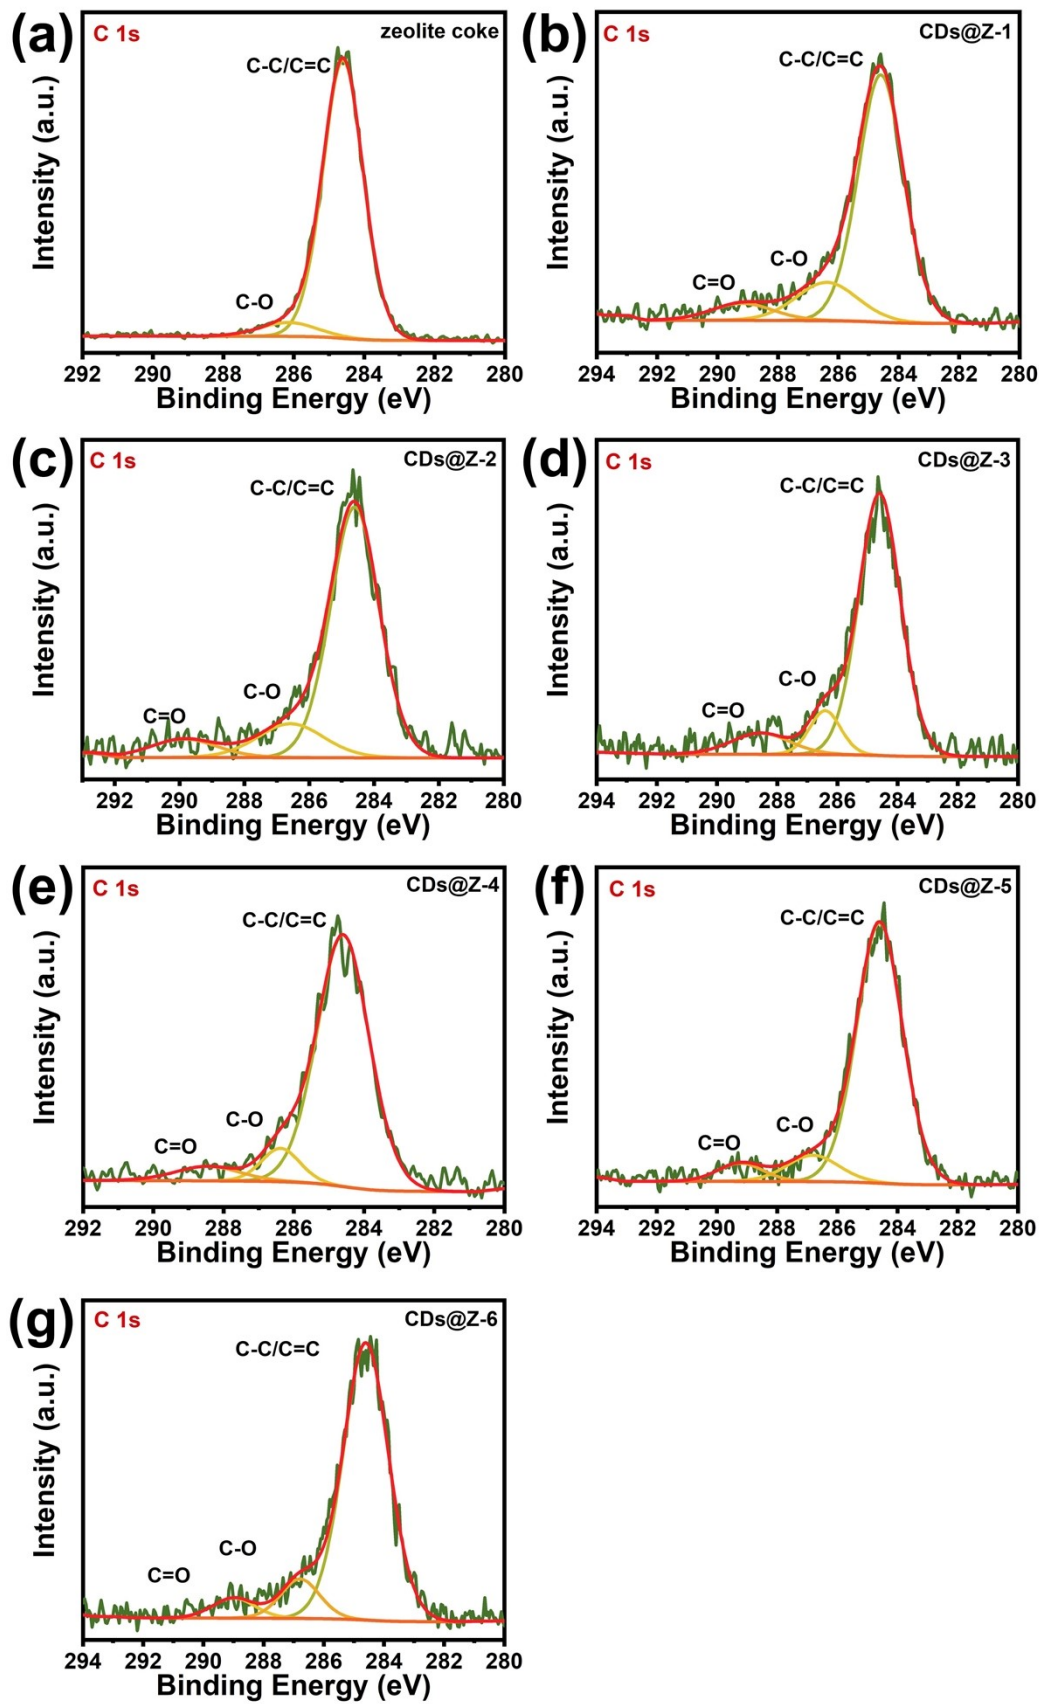

Fig. S10. C 1s high resolution fitting curves of zeolite coke and CD@Z-t (t=1、2、3、4、5、6).

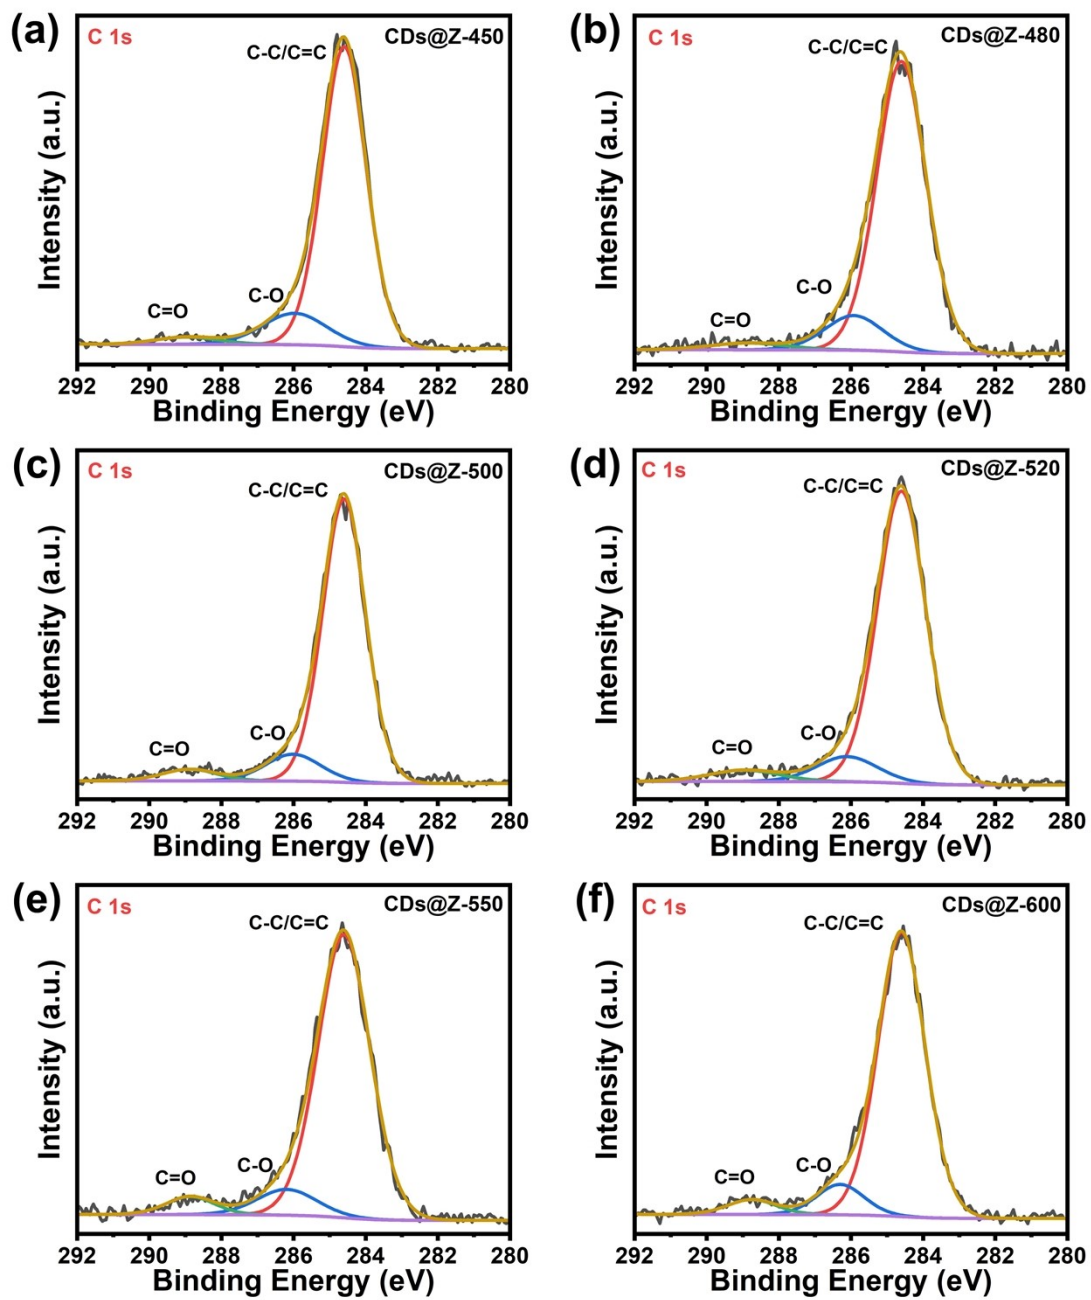

**Fig. S11.** C1s high resolution fitting curve of zeolite coke and CDs@Z-T (T=450、480、500、520、550、600).

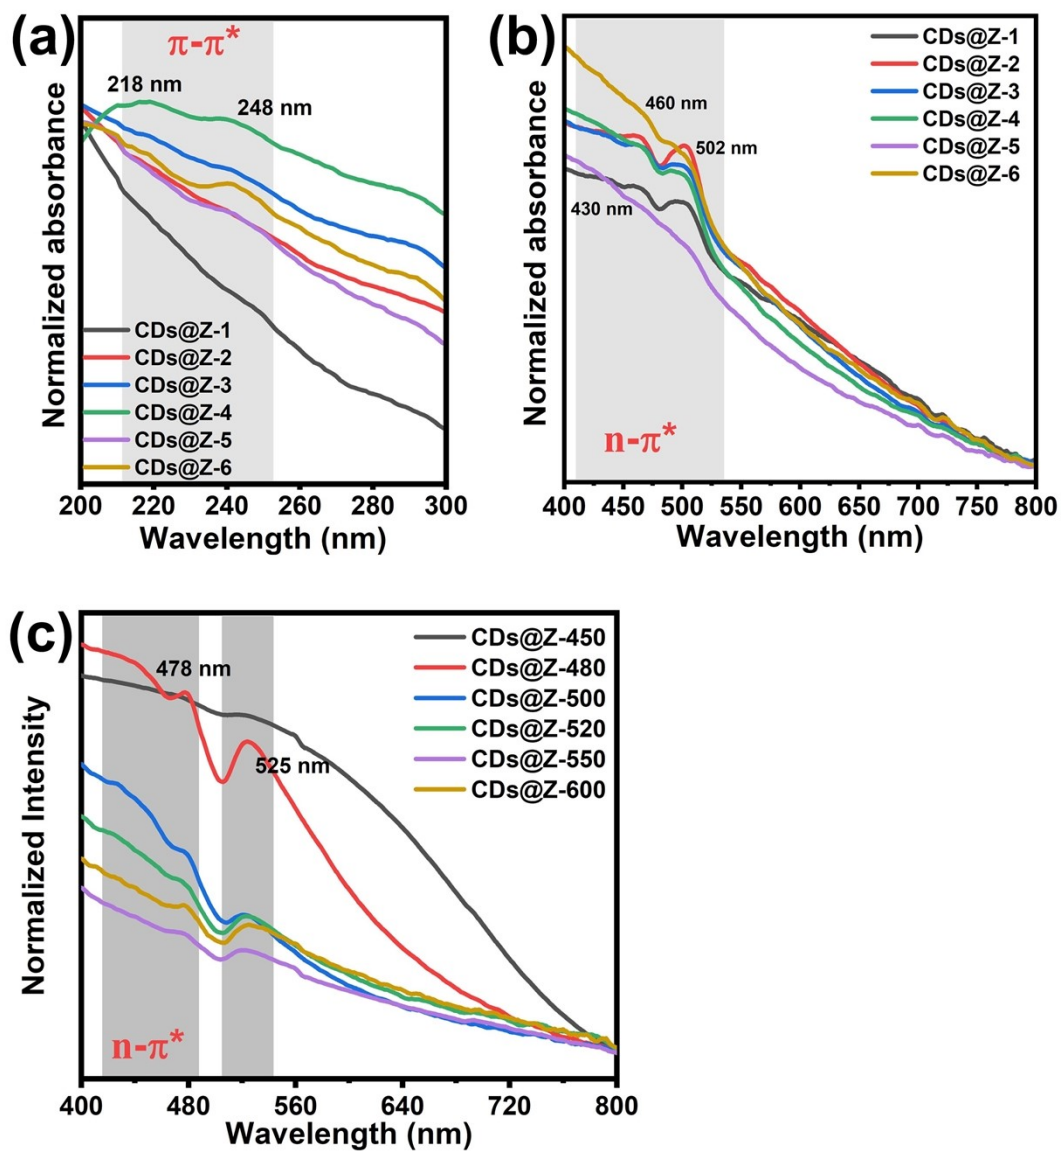

Fig. S12. UV-vis spectra of (a) CDs@Z-t composites (200-300 nm), (b) CDs@Z-t composites and (c) CDs@Z-T composites in the range of 400-800 nm.



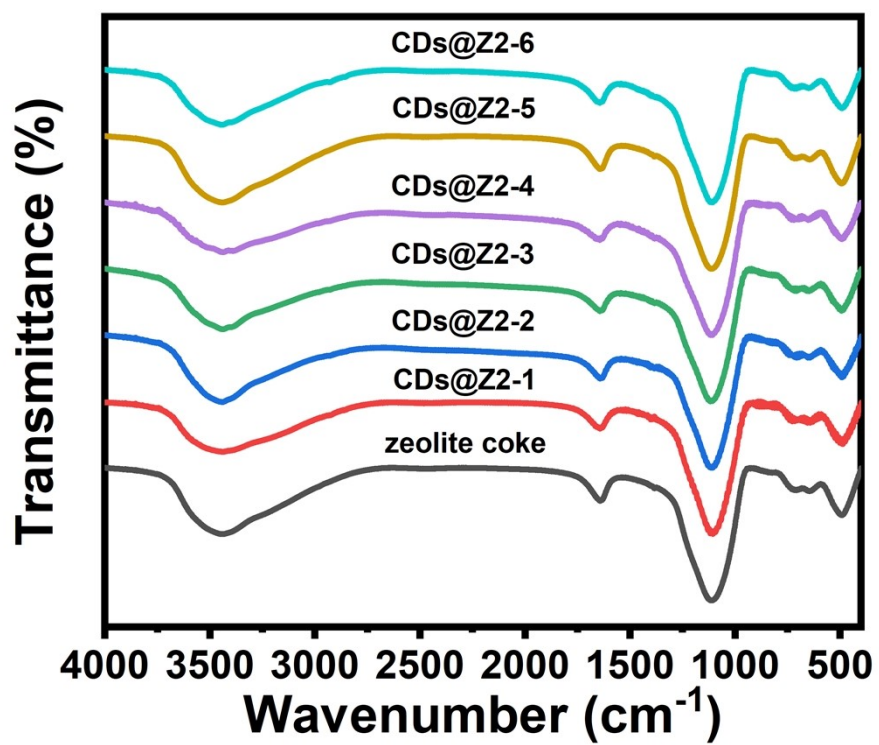

Fig. S13. FTIR spectra of CDs@Z-t composites.

**Table S1.** CHN element analysis of CDs@Z-T (T=450 , 480 , 500 , 520 , 550 , 600).

| <b>Samples</b> | <b>C (wt%)</b> | <b>N (wt%)</b> | <b>H (wt%)</b> |
|----------------|----------------|----------------|----------------|
| zeolite coke   | 10.55          | 0              | 1.59           |
| CDs@Z-450      | 1.41           | 0              | 1.87           |
| CDs@Z-480      | 0.65           | 0              | 1.89           |
| CDs@Z-500      | 0.42           | 0              | 1.89           |
| CDs@Z-520      | 0.43           | 0              | 1.91           |
| CDs@Z-550      | 0.32           | 0              | 1.87           |
| CDs@Z-600      | 0.28           | 0              | 1.87           |

**Table S2.** Fitting parameters for the FL decay curves of the CDs@Z-T composite.

| <b>Sample</b> | <b><math>\tau_1</math> (ns)</b> | <b><math>B_1</math> (%)</b> | <b><math>\tau_2</math> (ns)</b> | <b><math>B_2</math> (%)</b> | <b><math>\tau_{\text{avg}}</math> (ns)</b> | <b><math>\chi^2</math></b> |
|---------------|---------------------------------|-----------------------------|---------------------------------|-----------------------------|--------------------------------------------|----------------------------|
| CDs@Z-450     | 1.31                            | 52.96                       | 5.93                            | 47.04                       | 3.49                                       | 1.33                       |
| CDs@Z-480     | 1.45                            | 43.24                       | 6.86                            | 56.76                       | 4.52                                       | 1.43                       |
| CDs@Z-500     | 2.04                            | 43.68                       | 7.96                            | 56.32                       | 5.37                                       | 1.31                       |
| CDs@Z-520     | 2.90                            | 41.09                       | 9.66                            | 58.91                       | 6.88                                       | 1.20                       |
| CDs@Z-550     | 3.32                            | 31.46                       | 11.55                           | 68.54                       | 8.96                                       | 1.18                       |
| CDs@Z-600     | 3.30                            | 34.48                       | 11.72                           | 65.52                       | 8.82                                       | 1.28                       |

**Table S3.** Fitting parameters for the RTP decay curves of the CDs@Z-T composites.

| Sample    | $\tau_1$ (ms) | $B_1$ (%) | $\tau_2$ (ms) | $B_2$ (%) | $\tau_3$ (ms) | $B_3$ (%) | $\tau_{\text{avg}}$ (ms) | $\chi^2$ |
|-----------|---------------|-----------|---------------|-----------|---------------|-----------|--------------------------|----------|
| CDs@Z-450 | 17            | 14.69     | 103           | 57.10     | 345           | 28.21     | 158                      | 1.35     |
| CDs@Z-480 | 16            | 10.12     | 112           | 56.07     | 372           | 33.82     | 190                      | 1.20     |
| CDs@Z-500 | 19            | 9.39      | 126           | 54.27     | 411           | 36.34     | 220                      | 1.28     |
| CDs@Z-520 | 23            | 10.88     | 134           | 57.81     | 453           | 37.31     | 249                      | 1.30     |
| CDs@Z-550 | 37            | 20.29     | 176           | 79.71     |               |           | 147                      | 1.34     |
| CDs@Z-600 | 52            | 26.32     | 180           | 73.68     |               |           | 147                      | 1.26     |

**Table S4.** CHN element analysis of CDs@Z-t composites (t=1、2、3、4、5、6).

| <b>Sample</b> | <b>C (wt%)</b> | <b>N (wt%)</b> | <b>H (wt%)</b> |
|---------------|----------------|----------------|----------------|
| zeolite coke  | 9.45           | 0.00           | 1.95           |
| CDs@Z-1       | 1.37           | 0.00           | 2.23           |
| CDs@Z-2       | 0.88           | 0.00           | 2.31           |
| CDs@Z-3       | 0.47           | 0.00           | 2.28           |
| CDs@Z-4       | 0.35           | 0.00           | 2.32           |
| CDs@Z-5       | 0.32           | 0.00           | 2.30           |
| CDs@Z-6       | 0.30           | 0.00           | 2.29           |



**Table S5.** Fitting parameters for the FL decay curves of the CDs@Z-t composites.

| <b>Sample</b> | <b><math>\tau_1</math> (ns)</b> | <b><math>B_1</math> (%)</b> | <b><math>\tau_2</math> (ns)</b> | <b><math>B_2</math> (%)</b> | <b><math>\tau_3</math> (ns)</b> | <b><math>B_3</math> (%)</b> | <b><math>\tau_{\text{avg}}</math> (ns)</b> | <b><math>\chi^2</math></b> |
|---------------|---------------------------------|-----------------------------|---------------------------------|-----------------------------|---------------------------------|-----------------------------|--------------------------------------------|----------------------------|
| CDs@Z-1       | 0.56                            | 29.41                       | 2.57                            | 47.29                       | 9.32                            | 23.30                       | 3.55                                       | 1.12                       |
| CDs@Z-2       | 0.69                            | 24.35                       | 2.97                            | 51.27                       | 10.48                           | 24.38                       | 4.25                                       | 1.05                       |
| CDs@Z-3       | 0.90                            | 21.78                       | 3.55                            | 49.14                       | 10.82                           | 29.07                       | 5.09                                       | 0.99                       |
| CDs@Z-4       | 0.94                            | 16.38                       | 3.77                            | 49.86                       | 10.96                           | 33.76                       | 5.73                                       | 0.95                       |
| CDs@Z-5       | 1.03                            | 15.08                       | 3.75                            | 47.06                       | 10.85                           | 37.86                       | 6.03                                       | 1.06                       |
| CDs@Z-6       | 1.12                            | 12.44                       | 4.02                            | 48.98                       | 11.23                           | 38.58                       | 6.44                                       | 1.00                       |

**Table S6.** Fitting parameters for the RTP decay curves of the CDs@Z-t composites.

| <b>Sample</b> | <b><math>\tau_1</math> (ms)</b> | <b><math>B_1</math> (%)</b> | <b><math>\tau_2</math> (ms)</b> | <b><math>B_2</math> (%)</b> | <b><math>\tau_3</math> (ms)</b> | <b><math>B_3</math> (%)</b> | <b><math>\tau_{\text{avg}}</math> (ms)</b> | <b><math>\chi^2</math></b> |
|---------------|---------------------------------|-----------------------------|---------------------------------|-----------------------------|---------------------------------|-----------------------------|--------------------------------------------|----------------------------|
| CDs@Z-1       | 0.42                            | 9.83                        | 5.61                            | 21.82                       | 96.27                           | 68.35                       | 67.07                                      | 1.12                       |
| CDs@Z-2       | 1.37                            | 10.95                       | 13.22                           | 28.02                       | 135.7                           | 61.04                       | 86.69                                      | 1.20                       |
| CDs@Z-3       | 3.27                            | 11.76                       | 33.91                           | 28.94                       | 190.9                           | 59.30                       | 123.40                                     | 1.27                       |
| CDs@Z-4       | 2.25                            | 8.69                        | 18.48                           | 23.46                       | 151.1                           | 67.85                       | 106.98                                     | 1.31                       |
| CDs@Z-5       | 3.86                            | 11.18                       | 41.49                           | 29.95                       | 235.7                           | 58.87                       | 151.61                                     | 1.18                       |
| CDs@Z-6       | 4.66                            | 11.92                       | 46.58                           | 26.65                       | 252.5                           | 61.43                       | 168.08                                     | 1.24                       |

**Table S7.** C1s deconvolution of XPS spectra of CDs@Z-t (T=1、2、3、4、5、6).

| <b>Sample</b> | <b>C-C/C=C (%)</b> | <b>C-O (%)</b> | <b>C=O (%)</b> | <b>C-O and C=O (%)</b> |
|---------------|--------------------|----------------|----------------|------------------------|
| CDs@Z-1       | 76.68              | 16.16          | 7.16           | 23.32                  |
| CDs@Z-2       | 77.84              | 14.32          | 7.84           | 22.16                  |
| CDs@Z-3       | 80.71              | 10.10          | 9.19           | 19.29                  |
| CDs@Z-4       | 83.61              | 10.20          | 6.19           | 16.39                  |
| CDs@Z-5       | 84.39              | 9.75           | 5.86           | 15.61                  |
| CDs@Z-6       | 84.02              | 10.27          | 5.71           | 15.98                  |

**Table S8.** C 1s deconvolution of XPS spectra of CDs@Z-T (T=450、480、500、520、550、600).

| <b>Sample</b> | <b>C-C/C=C (%)</b> | <b>C-O (%)</b> | <b>C=O (%)</b> | <b>C-O and C=O (%)</b> |
|---------------|--------------------|----------------|----------------|------------------------|
| CDs@Z-450     | 84.13              | 12.90          | 2.98           | 15.87                  |
| CDs@Z-480     | 85.05              | 11.88          | 3.06           | 14.95                  |
| CDs@Z-500     | 85.15              | 10.41          | 4.43           | 14.85                  |
| CDs@Z-520     | 85.83              | 9.30           | 4.87           | 14.17                  |
| CDs@Z-550     | 85.93              | 8.96           | 5.11           | 14.07                  |
| CDs@Z-600     | 86.17              | 9.20           | 4.63           | 13.83                  |
